# Supplementary material
Source: HighWire-hosted journal article supplement (https://bmjopen.bmj.com/content/14/12/e088433)
Supplement: inline-supplementary-material-1 [file inline-supplementary-material-1.pdf]

Data extraction form

| Author/year | Country | Study design | Participant characteristics | Intervention type | Control/ comparison | Outcome of interest | Outcome measure | Effectiveness of the intervention |
|-------------|---------|--------------|-----------------------------|-------------------|---------------------|---------------------|-----------------|-----------------------------------|
|             |         |              |                             |                   |                     |                     |                 |                                   |
|             |         |              |                             |                   |                     |                     |                 |                                   |
|             |         |              |                             |                   |                     |                     |                 |                                   |
|             |         |              |                             |                   |                     |                     |                 |                                   |
|             |         |              |                             |                   |                     |                     |                 |                                   |
|             |         |              |                             |                   |                     |                     |                 |                                   |
|             |         |              |                             |                   |                     |                     |                 |                                   |
|             |         |              |                             |                   |                     |                     |                 |                                   |
|             |         |              |                             |                   |                     |                     |                 |                                   |
|             |         |              |                             |                   |                     |                     |                 |                                   |
|             |         |              |                             |                   |                     |                     |                 |                                   |
|             |         |              |                             |                   |                     |                     |                 |                                   |
|             |         |              |                             |                   |                     |                     |                 |                                   |
|             |         |              |                             |                   |                     |                     |                 |                                   |
|             |         |              |                             |                   |                     |                     |                 |                                   |
|             |         |              |                             |                   |                     |                     |                 |                                   |
